# Supplementary material
Source: PubMed Central journal article supplement (PMC4308423)
Supplement: NIHMS638857-supplement-Supplemental_Material.pdf [file NIHMS638857-supplement-Supplemental_Material.pdf]

## **SUPPLEMENTAL MATERIAL**

**Supplemental Table 1. University of Chicago Cohort**

|                                  | University of Chicago Cohort |              |
|----------------------------------|------------------------------|--------------|
|                                  | VR-PAH (n=5)                 | VN-PAH (n=6) |
| Age (years)                      | 35 ± 10                      | 44 ± 14      |
| Sex (m/f)                        | 0/5                          | 2/4          |
| Follow up (years)                | 12 ± 10                      | 11 ± 10      |
| Baseline                         |                              |              |
| mPAP (mmHg)                      | 51 ± 8                       | 52 ± 8       |
| CO (L/min)                       | 5 ± 1                        | 4 ± 1        |
| PVR (Wood Units)                 | 11 ± 4                       | 14 ± 4       |
| PVR after adenosine (Wood Units) | 3 ± 1                        | 9 ± 4        |

Supplemental Table 2.

| Gene Name | Control<br>(n=3)  | VN-PAH 1<br>(n=13) | VD-PAH 1<br>(n=8) | VN-PAH 2<br>(n=6) | VD-PAH 2<br>(n=5) |
|-----------|-------------------|--------------------|-------------------|-------------------|-------------------|
| DSG2      | -7.984<br>(0.287) | -6.639<br>(0.786)  | -8.201<br>(0.354) | -7.825<br>(0.826) | -9.311<br>(0.445) |
| EPDR1     | -8.519<br>(0.517) | -5.232<br>(1.631)  | -8.492<br>(0.881) | -8.601<br>(0.936) | -8.375<br>(0.985) |
| SCD5      | -4.961<br>(0.893) | -1.197<br>(1.880)  | -5.060<br>(0.855) | -3.938<br>(0.743) | -4.220<br>(0.355) |
| P2RY5     | -9.393<br>(0.931) | -4.861<br>(2.548)  | -9.877<br>(0.571) | -9.800<br>(0.663) | -6.135<br>(0.284) |
| RHOQ      | 2.541 (0.296)     | 4.563 (1.193)      | 2.243 (0.486)     | 3.050 (0.497)     | 2.349 (0.184)     |
| UCHL1     | -8.283<br>(1.058) | -5.548<br>(1.394)  | -8.173<br>(0.814) | -6.988<br>(0.645) | -8.052<br>(0.445) |
| TPD52     | -0.080<br>(0.478) | 0.4360<br>(0.558)  | -0.314<br>(0.333) | -0.825<br>(0.362) | -0.729<br>(0.247) |
| MGAT5     | 0.296 (0.362)     | -0.987<br>(1.148)  | 0.9624<br>(0.531) | 0.419 (0.198)     | 0.527 (0.268)     |
| ZNF652    | 1.180 (0.627)     | 3.895 (1.621)      | 1.416 (0.713)     | 3.251 (1.216)     | 2.085 (0.313)     |
| RALGPS2   | 0.795 (0.145)     | -0.934<br>(1.178)  | 0.958 (0.697)     | 0.138 (0.320)     | 0.175 (0.399)     |
| MKLN1     | 0.564 (0.416)     | 3.593 (2.000)      | 0.464 (0.645)     | 1.182 (0.424)     | 0.948 (0.286)     |
| RAPGEF2   | -0.760<br>(0.367) | -2.697<br>(1.579)  | -0.927<br>(1.112) | -1.257<br>(0.597) | -0.750<br>(0.213) |
| PIAS1     | 2.077 (0.208)     | 2.843 (0.936)      | 1.611 (0.547)     | 2.253 (0.567)     | 1.988 (0.278)     |

Data are presented as mean ( $\pm$ SD) expression level of gene cycle number relative to HPRT.
